# Supplementary material for: Regeneration of CD8αβ T Cells from T-cell–Derived iPSC Imparts Potent Tumor Antigen-Specific Cytotoxicity
Source: Oxford University Press journal article supplement (doi:10.1158/0008-5472.can-16-1149), 2016-11-21
Supplement: 00085472can161149-sup-165408_1_supp_3645098_4cnzwp.docx [file 00085472can161149-sup-165408_1_supp_3645098_4cnzwp.docx]

**Table S1. Sequence of the TCR junctional region and alpha and beta chain V(D)J usage of the original and regenerated CTLs.**

| source | α | Vα | - | Jα | 3’Vα | N | 5’Jα |
| --- | --- | --- | --- | --- | --- | --- | --- |
| β | Vβ | Dβ | Jβ | 3’Vβ | N-Dβ-N | 5’Jβ |
| p-CTL  LMP2#1 | α | TRAV26-1*01 | - | TRAJ34*01 | TGCATCGTCA | CCCGTTTTT | ACACCGACAAGCTCATCTTT |
| β | TRBV14*01 | TRBD2*01 | TRBJ2-1*01 | TGTGCCAGCAGC | TCCCCGGGGAGTCGAC | CCTACAATGAGCAGTTCTTC |
| r-CD8αβ  LMP2#1-1 | α | TRAV26-1*01 | - | TRAJ34*01 | TGCATCGTCA | CCCGTTTTT | ACACCGACAAGCTCATCTTT |
| β | TRBV14*01 | TRBD2*01 | TRBJ2-1*01 | TGTGCCAGCAGC | TCCCCGGGGAGTCGAC | CCTACAATGAGCAGTTCTTC |
| p-CTL  LMP2#2 | α | TRAV25*01 | - | TRAJ18*01 | TGTGCAGGG | GAG | AGAGGCTCAACCCTGGGGAGGCTATA |
| β | TRBV7-9*03 | TRBD1*01 | TRBJ2-7*01 | TGTGCCAGCAGC | CCACTGTCGACAGGGAA | CTACGAGCAGTACTTC |
| r-CD8αβ  LMP2#2-13 | α | TRAV25*01 | - | TRAJ18*01 | TGTGCAGGG | GAG | AGAGGCTCAACCCTGGGGAGGCTATA |
| β | TRBV7-9*03 | TRBD1*01 | TRBJ2-7*01 | TGTGCCAGCAGC | CCACTGTCGACAGGGAA | CTACGAGCAGTACTTC |
| p-CTL  WT1#1 | α | TRAV12-3*01 | - | TRAJ34*01 | TGTGCAATGA | TAAGAGGG | AACACCGACAAGCTCATCTTT |
| β | TRBV5-5*02 | - | TRBJ2-7*01 | TGCCAGCAGCTT | CCC | CTCCTACGAGCAGTACTTC |
| r-CD8αβ  WT1#1-9 | α | TRAV12-3*01 | - | TRAJ34*01 | TGTGCAATGA | TAAGAGGG | AACACCGACAAGCTCATCTTT |
| β | TRBV5-5*02 | - | TRBJ2-7*01 | TGCCAGCAGCTT | CCC | CTCCTACGAGCAGTACTTC |
| p-CTL  WT1#3 | α | TRAV12-1*01 | - | TRAJ9*01 | TGTGTGGTGA | GGGG | TGGAGGCTTCAAAACTATCTTT |
| β | TRBV20-1*01 | TRBD1*01 | TRBJ2-6*01 | GCAGTGCTAGAG | CAGGGACGGG | TGGGGCCAACGTCCTGACTTTC |
| r-CD8αβ  WT1#3-3 | α | TRAV12-1*01 | - | TRAJ9*01 | TGTGTGGTGA | GGGG | TGGAGGCTTCAAAACTATCTTT |
| β | TRBV20-1*01 | TRBD1*01 | TRBJ2-6*01 | GCAGTGCTAGAG | CAGGGACGGG | TGGGGCCAACGTCCTGACTTTC |
| p-CTL  WT1#9 | α | TRAV12-1*01 | - | TRAJ9*01 | TGTGTGGTGAA | G | GGAGGCTTCAAAACTATCTTT |
| β | TRBV20-1*01 | TRBD2*01 | TRBJ2-1*01 | TGCAGTGCTAGA | TTGGGTAGCGGGGGA | TACAATGAGCAGTTCTTC |
| r-CD8αβ  WT1#9-2 | α | TRAV12-1*01 | - | TRAJ9*01 | TGTGTGGTGAA | G | GGAGGCTTCAAAACTATCTTT |
| β | TRBV20-1*01 | TRBD2*01 | TRBJ2-1*01 | TGCAGTGCTAGA | TTGGGTAGCGGGGGA | TACAATGAGCAGTTCTTC |

p-CTL means primary CTLs and r-CD8αβ means regenerated CD8αβ T cells from T-iPSCs
