# Supplementary material for: Regeneration of CD8αβ T Cells from T-cell–Derived iPSC Imparts Potent Tumor Antigen-Specific Cytotoxicity
Source: Oxford University Press journal article supplement (doi:10.1158/0008-5472.can-16-1149), 2016-11-21
Supplement: 00085472can161149-sup-165408_1_supp_3645099_qcnzxg.docx [file 00085472can161149-sup-165408_1_supp_3645099_qcnzxg.docx]

**Table S2. Number of primary CTLs and established T-iPSCs and comparison of IC50 of original CTLs and regenerated CD8αβ T cells**

| Original CTLs | Number of CTLs | Number of established (specific) iPS clones | IC 50 of  original CTLs | IC 50 of  regenerated CD8αβ T |
| --- | --- | --- | --- | --- |
| p-CTL  LMP2#1 | 1 x 106 | 5 (3) | 100 pM - 1 nM | 1 nM – 10 nM |
| p-CTL  LMP2#2 | 1 x 106 | 10 (10) | 10 pM-100 pM | 100 pM- 1 nM |
| p-CTL  WT1#1 | 7 x 105 | 18 (3) | N.D. | 10 pM – 100 pM |
| p-CTL  WT1#3 | 1 x 106 | 6 (6) | 100 pM | 100 pM |
| p-CTL  WT1#9 | 1 x 106 | 4 (4) | 10 pM – 100 pM | 100 pM – 1 nM |

Number of T cells used to establish T-iPSCs, number of clones established and number of clones specific for each antigen were shown. IC50 were evaluated by killing assay against target cells pulsed with each antigen at various concentration as shown in Fig. 5A, 5G, 6H, etc. N.D.; Not done.
